# Supplementary material for: Highly Processed Food Consumption and Its Association with Anthropometric, Sociodemographic, and Behavioral Characteristics in a Nationwide Sample of 2742 Japanese Adults: An Analysis Based on 8-Day Weighed Dietary Records
Source: MDPI journal article supplement (doi:10.3390/nu15051295), 2023-03-06
Supplement: s1 [file s1]

**Table S1.** Examples of highly processed foods classified according to the food code in each food group<sup>1</sup>

| Food Group                     | Examples (Food codes in brackets are based on the Standard Tables of Food Composition in Japan 2020 –Eighth revision–)                                                                                                                                                                                                                                                                                                                                                                                                                                                                                                                                                                                                                                                                                                                                                                                                                                                                                                                                                                                                                                                                                                                                                                                                              |
|--------------------------------|-------------------------------------------------------------------------------------------------------------------------------------------------------------------------------------------------------------------------------------------------------------------------------------------------------------------------------------------------------------------------------------------------------------------------------------------------------------------------------------------------------------------------------------------------------------------------------------------------------------------------------------------------------------------------------------------------------------------------------------------------------------------------------------------------------------------------------------------------------------------------------------------------------------------------------------------------------------------------------------------------------------------------------------------------------------------------------------------------------------------------------------------------------------------------------------------------------------------------------------------------------------------------------------------------------------------------------------|
| Cereals and starchy foods      | [1024] Premixed flour for pancake; [1025] premixed flour for Tempura; [1026] white bread; [1028] white long roll bread; [1031] French bread; [1032] rye and wheat bread; [1034] soft roll bread; [1035] croissants; [1036] English muffins; [1056] instant Chinese noodles, dried by frying, seasoned; [1057] instant Chinese noodles, dried by frying, not seasoned; [1058] instant Chinese noodles, dried without frying; [1060] "yakisoba", instant Chinese oil-fried noodles, dried by frying and in cups; [1061] instant Chinese noodles, dried by without frying and packed in cups; [1062] instant "udon" noodles dried by frying and packed in cups; [1071] wheat gluten, powdered type; [1074] outer steamed wheat "Jiaozi "(Chinese meat dumpling) dough ; [1075] outer steamed wheat "Shumai" (Chinese meat dumpling) dough ; [1076] pizza crust; [1077] bread crumbs, fresh; [1079] bread crumbs, dry ; [1118] rice, glutinous rice products, "Sekihan" (steamed rice with adzuki beans or cowpeas); [1137] corn, cornflakes; [1146] premixed flour for "Okonomiyaki" (Japanese-style savory pancake with various ingredients); [1147] premixed flour for fried food; [1171] premixed flour for Tempura; [11191] soy-sauce flavored instant Chinese noodles, dried by frying and packed in cups                         |
| Fruits, vegetables, and pulses | [4041] Soybeans, tofu, "Ganmodoki" (fried mixture of crushed tofu, vegetables and ground yam); [4053] soybeans, soy milk, reconstituted; [4054] soybeans, soy milk based beverage, coffee flavored                                                                                                                                                                                                                                                                                                                                                                                                                                                                                                                                                                                                                                                                                                                                                                                                                                                                                                                                                                                                                                                                                                                                  |
| Meat, fish, and eggs           | [10376] "Kanifumi-kamaboko" (imitation crab meat made from surimi); [10379] "Mushi-kamaboko" (steamed kamaboko); [10381] "Yaki-chikuwa" (baked tubular kamaboko); [10383] "Tsumire" (boiled red meat fish paste); [10384] "Naruto" (boiled stick kamaboko with cross section of red swirl); [10385] "Hanpen" (boiled fishcake made of surimi, yam paste and starch); [10386] "Satsuma-age" (fried surimi); [10388] fish sausage; [10390] breaded and friedhorse mackerel with integument; [10416] crustacean, whiteleg shrimp, tempura; [11178] pork, ham, pressed; [11186] pork sausage, Vienna; [11189] pork sausage, Frankfurter; [11190] pork sausage, Bologna; [11276] pork, large type breed, loin, "Tonkatsu"(breaded and fried pork, lean and fat); [11279] pork, large type breed, fillet, lean, "Tonkatsu"(breaded and fried pork); [11289] "Karaage"(floured and deep-fried chicken thigh with skin); [11290] "Karaage"(floured and deep-fried chicken thigh without skin); [11292] chicken nuggets; [11293] "Tsukune" (Japanese chicken meatball); [12017] Tamago-dofu (cold savory egg custard); [12018] Tamago-yaki (Rolled omelet), Atsuyaki-tamago (sweet rolled omelet with Katsuo-bushi and kombu dashi); [12019] Tamago-yaki (Rolled omelet), Dashimaki-tamago (rolled omelet with Katsuo-bushi and kombu dashi) |

**Table S1. Continued**

| Food Group      | Examples (Food codes in brackets are based on the Standard Tables of Food Composition in Japan 2020 –Eighth revision–)                                                                                                                                                                                                                                                                                                                                                                                                                                                                                                                                                                                                                                                                                                                                                                                                                                                                                                                                                                                                                                                                                                                                                                                                                                                                                                                                                                                                                                                                                                                                                                                                                                                                                  |
|-----------------|---------------------------------------------------------------------------------------------------------------------------------------------------------------------------------------------------------------------------------------------------------------------------------------------------------------------------------------------------------------------------------------------------------------------------------------------------------------------------------------------------------------------------------------------------------------------------------------------------------------------------------------------------------------------------------------------------------------------------------------------------------------------------------------------------------------------------------------------------------------------------------------------------------------------------------------------------------------------------------------------------------------------------------------------------------------------------------------------------------------------------------------------------------------------------------------------------------------------------------------------------------------------------------------------------------------------------------------------------------------------------------------------------------------------------------------------------------------------------------------------------------------------------------------------------------------------------------------------------------------------------------------------------------------------------------------------------------------------------------------------------------------------------------------------------------|
| Dairy products  | [13007] Milk beverages, coffee flavored; [13015] cream substitute, milk and vegetable fats; [13016] cream substitute, vegetable fat; [13017] whipping cream, milk fat, with added sugar; [13018] whipping cream substitute, milk and vegetable fats, with added sugar; [13019] whipping cream substitute, vegetable fat, with added sugar; [13020] coffee whitener, liquid, milk fat; [13022] coffee whitener, liquid, vegetable fat; [13023] coffee whitener, powder, milk fat; [13024] coffee whitener, powder, vegetable fat; [13040] cheeses, processed; [13042] ice cream, high fat; [13043] ice cream, regular; [13044] ice cream, ice milk; [13045] ice cream, lacto-ice, regular; [13046] ice cream, lacto-ice, low fat; [13047] ice cream, soft-serve; [13049] sherbet                                                                                                                                                                                                                                                                                                                                                                                                                                                                                                                                                                                                                                                                                                                                                                                                                                                                                                                                                                                                                         |
| Confectioneries | [1033] Raisin bread; [15005] "Imagawayaki" (Japanese waffle stuffed with red bean paste); [15009] "Kasutera" (rectangle sponge cake); [15023] "Daifuku-mochi" (sweet rice cake stuffed with red bean paste); [15027] "Dorayaki" (Japanese pancake sandwich with red bean paste filling); [15033] "Mushi-manju" (steamed sweet dough stuffed with red bean paste); [15035] Chinese style steamed bun, stuffed with meat and vegetable; [15041] "Amedama" (sugar candy); [15057] "Age-senbei" (fried and salted rice cracker); [15059] "Arare" (glutinous rice cracker); [15060] "Shoyu-senbei" (soy sauce flavored rice cracker); [15069] baked bun with red bean paste filling, regular; [15070] baked bun with custard cream filling, regular; [15073] custard cream puff; [15074] sponge cake; [15075] layered cream cake; [15076] Danish pastry; [15077] doughnuts, yeast-leavened; [15078] doughnuts, cake-type; [15079] pie pastry; [15080] apple pie; [15082] butter cake; [15083] thick pancake; [15086] caramel custard pudding; [15087] orange jelly; [15095] sablé shortbread; [15096] puff pastry biscuits; [15097] hard biscuits; [15098] soft biscuits; [15101] wheat flour snack, extruded; [15102] corn snack, extruded; [15103] potato chips, regular; [15104] potato chips, fabricated; [15105] caramel soft candy; [15106] compressed tablet candy; [15110] sugar candy; [15113] marshmallows; [15114] chocolate-covered biscuit; [15115] white chocolate; [15116] milk chocolate; [15119] Chewing gum, sugar-coated; [15127] fried bun with curry filling; [15132] "Melon-pan" (sweet bun covered in a thin layer of crisp cookie dough); [15134] cheesecake, baked; [15137] chocolate with almonds; [15138] pastry cream; [15141] wafers with cream; [15142] jelly made from konjac |

Table S1. Continued

| Food Group              | Examples (Food codes in brackets are based on the Standard Tables of Food Composition in Japan 2020 –Eighth revision–)                                                                                                                                                                                                                                                                                                                                                                                                                                                                                                                                                                                                                                                                                                                                                                                                                                                                                                                                                                                                                                                                                                                                                                                                                                      |
|-------------------------|-------------------------------------------------------------------------------------------------------------------------------------------------------------------------------------------------------------------------------------------------------------------------------------------------------------------------------------------------------------------------------------------------------------------------------------------------------------------------------------------------------------------------------------------------------------------------------------------------------------------------------------------------------------------------------------------------------------------------------------------------------------------------------------------------------------------------------------------------------------------------------------------------------------------------------------------------------------------------------------------------------------------------------------------------------------------------------------------------------------------------------------------------------------------------------------------------------------------------------------------------------------------------------------------------------------------------------------------------------------|
| Alcoholic beverages     | [16001] "Sake", regular; [16002] "Sake", "Junmai" (made with only rice, water and koji) ; [16003] "Sake", "Honjozo" (made with rice, water, koji and distilled alcohol. The rice used must be polished to at least 70%) ; [16006] beer, pale; [16009] "Happoshu" (beer-like beverage with less than 67% malt content); [16010] white wine; [16011] red wine; [16014] "Shochu", distilled through a continuous still; [16015] "Shochu", distilled through a pot still; [16016] whisky; [16023] synthetic "Sake"; [16025] "Mirin" (sweet liquor made from rice, rice koji and Shochu or distilled alcohol), regular; [16059] lemon-flavored canned shochu highball                                                                                                                                                                                                                                                                                                                                                                                                                                                                                                                                                                                                                                                                                            |
| Non-alcoholic beverages | [7004] Acerola 10 % fruit juice beverage; [16047] ready-to-drink canned coffee with milk and sugar; [16049] cocoa; [16051] "Kobu-cha" (kombu powder for drink); [16052] fruit flavored and colored carbonated beverage; [16053] cola; [16054] clear soda; [16057] sports drink; [16058] beer-flavored carbonated drink, alcohol free                                                                                                                                                                                                                                                                                                                                                                                                                                                                                                                                                                                                                                                                                                                                                                                                                                                                                                                                                                                                                        |
| Fats and oils           | [14020] Margarine, soft type, home use; [14021] fat spread; [14022] shortening, home use; [14029] margarine, soft type, commercial use; [14030] shortening, commercial use for confectionery; [17039] soy sauce based, fat-free; [17040] French dressing; [17041] thousand island dressing; [17042] mayonnaise, whole egg type; [17043] mayonnaise, egg yolk type; [17116] soy sauce based, with oil; [17117] sesame dressing; [17118] mayonnaise-type dressing, low calorie type                                                                                                                                                                                                                                                                                                                                                                                                                                                                                                                                                                                                                                                                                                                                                                                                                                                                           |
| Seasonings and spices   | [3026] glucose fructose syrup ; [17001] Japanese Worcester sauce, common type; [17002] Japanese Worcester sauce, semi-thick type; [17003] Japanese Worcester sauce, thick type; [17004] Doubanjiang; [17006] Chinese chili oil; [17007] "Koikuchi-shoyu" (common soy sauce); [17008] "Usukuchi-shoyu" (light color soy sauce); [17009] "Tamari-shoyu" (full-bodied soy sauce); [17011] "Shiro-shoyu" (extra light color soy sauce); [17015] grain vinegar; [17016] rice vinegar; [17018] fruit vinegar, cider vinegar; [17019] "Katsuo-bushi dashi" (stock of "Katsuo-bushi"); [17020] "kombu dashi" (stock of dried kombu); [17021] "Katsuo-bushi and kombu dashi" (stock of "Katsuo-bushi" and dried kombu) ; [17022] "Shiitake dashi" (stock of dried Shiitake mushroom); [17023] "Niboshi dashi" (stock of small dried sardine); [17024] chicken bone stock; [17025] chicken, pork and vegetable stock; [17026] beef and vegetable stock; [17027] meat and vegetable stock cubes; [17028] stock powder, "Katsuo-bushi"; [17029] Japanese noodle soup, non-concentrated (soy sauce base); [17030] Japanese noodle soup, triple-concentrated (soy sauce base); [17031] oyster sauce; [17032] mapo tofu sauce; [17033] meat sauce; [17036] ketchup; [17037] tomato sauce; [17049] instant miso soup, powdered type; [17050] instant miso soup, paste type; |

**Table S1. Continued**

| Food Group            | Examples (Food codes in brackets are based on the Standard Tables of Food Composition in Japan 2020 –Eighth revision–)                                                                                                                                                                                                                                                                                                                                                                                                                                                                                                                                                                                                                                                                                                                                                                                                                                                                                                                                                                                                                                                                                                                                                                                                                                                                                                                                                                                                                                                                                                                                                                                                                                                                                                                                                                                                                                                                                                 |
|-----------------------|------------------------------------------------------------------------------------------------------------------------------------------------------------------------------------------------------------------------------------------------------------------------------------------------------------------------------------------------------------------------------------------------------------------------------------------------------------------------------------------------------------------------------------------------------------------------------------------------------------------------------------------------------------------------------------------------------------------------------------------------------------------------------------------------------------------------------------------------------------------------------------------------------------------------------------------------------------------------------------------------------------------------------------------------------------------------------------------------------------------------------------------------------------------------------------------------------------------------------------------------------------------------------------------------------------------------------------------------------------------------------------------------------------------------------------------------------------------------------------------------------------------------------------------------------------------------------------------------------------------------------------------------------------------------------------------------------------------------------------------------------------------------------------------------------------------------------------------------------------------------------------------------------------------------------------------------------------------------------------------------------------------------|
| Seasonings and spices | [17051] Japanese curry roux, instant; [17052] hash and rice roux, instant; [17053] "Sakekasu" (sake lees); [17054] mirin-like sweet cooking seasoning; [17056] onion powder; [17058] mustard, paste ; [17059] mustard, yellow mustard; [17060] mustard, whole grain mustard; [17076] garlic paste; [17081] wasabi paste ; [17085] Japanese Worcester sauce, sweet thick type for "Okonomiyaki" (Japanese-style savory pancake with various ingredients); [17086] salt-reduced soy sauce; [17087] pre-seasoned soy sauce with soup stock; [17090] black rice vinegar; [17092] stock powder for "Oden" (Japanese winter hodgepodge); [17093] stock powder, chicken, pork and vegetable; [17094] sweet vinegar; [17098] sesame sauce; [17099] "Sanbaizu" (vinegar mixture containing sesami, soy sauce and mirin); [17101] sweetened vinegar for "Inarizushi" (fried tofu pouch filled with sushi rice) ; [17103] sweetened vinegar for "Makizushi" (rolled sushi) and "Hakozushi"(pressed sushi); [17104] Chinese style vinegar; [17105] demi-glace sauce; [17106] Tian Mian Jiang (sweet soybean paste); [17108] seasoning sauce for "Hiyashi-chuka" (ramen noodles in a cold sweet soy sauce broth topped with meat and vegetables) ; [17109] white sauce; [17110] ponzu vinegar with soy sauce; [17112] seasoning sauce for "Yakitori" (grilled chicken skewers); [17113] barbecue sauce, soy sauce based; [17115] "Yuzu kosho" (spicy paste made from chili, yuzu zest and salt); [17119] salt reduced miso; [17120] pre-seasoned miso with soup stock; [17124] "Neri-miso" (miso sauce containing egg and mirin) ; [17125] seasoning mix for "Ochazuke" (bowl of rice soaked in dashi broth); [17126] instant soup mix, "Sumashi-jiru" (Japanese traditional clear-soup); [17127] "Furikake" (Seasoning mix for rice, containing dried seaweed and egg); [17130] ago dashi (stock of dried flying fish); [17136] kimuchi seasoning; [17137] ponzu vinegar with soy sauce, commercial products; [17138] cooking wine |
| Pickles               | [6143] Japanese radishes, Daikon, root, pickles, "Fukujin-zuke" (pickled with Daikon, eggplant, immature sword pods and east Indian lotus rhizome)                                                                                                                                                                                                                                                                                                                                                                                                                                                                                                                                                                                                                                                                                                                                                                                                                                                                                                                                                                                                                                                                                                                                                                                                                                                                                                                                                                                                                                                                                                                                                                                                                                                                                                                                                                                                                                                                     |

<sup>1</sup>Among the 421 food codes of highly processed foods in the 8-day dietary record of 2742 participants, the 227 food codes that appeared  $\geq 100$  times are shown.

**Table S2.** Associations of highly processed food consumption when foods consumed as a dish consisting of multiple ingredients are classified as highly processed food (high-estimate scenario) with basic characteristics of Japanese adults ( $n = 2742$ )

| Variables                                | % of grams             |                         |       |         | % of energy            |                         |        |         |
|------------------------------------------|------------------------|-------------------------|-------|---------|------------------------|-------------------------|--------|---------|
|                                          | Regression coefficient | 95% confidence interval |       | $p^1$   | Regression coefficient | 95% confidence interval |        | $p^1$   |
| Age group (y)                            |                        |                         |       |         |                        |                         |        |         |
| 18–39                                    | Ref                    | -                       | -     | -       | Ref                    | -                       | -      | -       |
| 40–59                                    | -3.39                  | -4.54                   | -2.23 | <0.0001 | -5.45                  | -6.64                   | -4.26  | <0.0001 |
| 60–79                                    | -10.19                 | -11.52                  | -8.86 | <0.0001 | -13.21                 | -14.58                  | -11.85 | <0.0001 |
| Sex                                      |                        |                         |       |         |                        |                         |        |         |
| Male                                     | Ref                    | -                       | -     | -       | Ref                    | -                       | -      | -       |
| Female                                   | -3.03                  | -4.10                   | -1.97 | <0.0001 | -0.24                  | -1.34                   | 0.86   | 0.67    |
| BMI (kg/m <sup>2</sup> )                 |                        |                         |       |         |                        |                         |        |         |
| Q1 (median: 19.8)                        | Ref                    | -                       | -     | -       | Ref                    | -                       | -      | -       |
| Q2 (median: 22.5)                        | 2.01                   | 0.07                    | 3.95  | 0.04    | 2.10                   | 0.10                    | 4.09   | 0.04    |
| Q3 (median: 26.1)                        | 1.62                   | -0.50                   | 3.74  | 0.13    | 2.83                   | 0.65                    | 5.00   | 0.01    |
| Annual household income (%) <sup>2</sup> |                        |                         |       |         |                        |                         |        |         |
| <4 million Japanese yen                  | Ref                    | -                       | -     | -       | Ref                    | -                       | -      | -       |
| ≥4 to <7 million Japanese yen            | 0.62                   | -0.51                   | 1.75  | 0.28    | -0.20                  | -1.36                   | 0.96   | 0.74    |
| ≥7 million Japanese yen                  | 1.36                   | 0.17                    | 2.54  | 0.03    | -0.04                  | -1.26                   | 1.18   | 0.95    |
| Educational level (%)                    |                        |                         |       |         |                        |                         |        |         |
| Junior high school or high school        | Ref                    | -                       | -     | -       | Ref                    | -                       | -      | -       |
| College or technical school              | 0.94                   | -0.23                   | 2.11  | 0.12    | 1.14                   | -0.07                   | 2.34   | 0.06    |
| University or higher                     | 1.03                   | -0.15                   | 2.22  | 0.09    | 1.13                   | -0.09                   | 2.35   | 0.07    |
| Smoking status (%)                       |                        |                         |       |         |                        |                         |        |         |
| Current smoker                           | Ref                    | -                       | -     | -       | Ref                    | -                       | -      | -       |
| Past smoker                              | -2.82                  | -4.35                   | -1.30 | 0.0003  | -2.48                  | -4.05                   | -0.92  | 0.002   |
| Never smoker                             | -5.45                  | -6.81                   | -4.09 | <0.0001 | -5.26                  | -6.66                   | -3.86  | <0.0001 |
| Employment status (%)                    |                        |                         |       |         |                        |                         |        |         |
| Unemployed (including students)          | Ref                    | -                       | -     | -       | Ref                    | -                       | -      | -       |
| Part-time job                            | 4.11                   | 2.45                    | 5.77  | <0.0001 | 3.53                   | 1.82                    | 5.23   | <0.0001 |
| Full-time job                            | 10.43                  | 9.04                    | 11.81 | <0.0001 | 8.24                   | 6.82                    | 9.66   | <0.0001 |
| Physical activity level (MET × h)        |                        |                         |       |         |                        |                         |        |         |
| Q1 (median: 33.3)                        | Ref                    | -                       | -     | -       | Ref                    | -                       | -      | -       |
| Q2 (median: 38.3)                        | -0.84                  | -1.97                   | 0.29  | 0.15    | -1.05                  | -2.21                   | 0.11   | 0.08    |
| Q3 (median: 45.0)                        | -0.52                  | -1.67                   | 0.62  | 0.37    | -0.12                  | -1.30                   | 1.06   | 0.84    |

MET, metabolic equivalent; SD, standard deviation; T, tertile. <sup>1</sup>Multivariable linear regression was used including all variables in the model simultaneously. <sup>2</sup>The subjects were categorized into tertiles.
